# Supplementary material
Source: HighWire-hosted journal article supplement (https://bmjopen.bmj.com/content/8/3/e020309)
Supplement: inline-supplementary-material-1 [file inline-supplementary-material-1.pdf]

**Appendix 1.** Baseline characteristics by level of refill adherence during implementation of lipid-lowering medications, for primary prevention patients.

|                      |                               | All<br>n = 74,909 |        | ≤20%<br>n = 4,884 |        | 21-40%<br>n = 6,168 |        | 41-60%<br>n = 7,490 |        | 61-80%<br>n = 10,579 |        | >80%<br>n = 45,788 |        |
|----------------------|-------------------------------|-------------------|--------|-------------------|--------|---------------------|--------|---------------------|--------|----------------------|--------|--------------------|--------|
|                      |                               | n                 | %      | n                 | %      | n                   | %      | n                   | %      | n                    | %      | n                  | %      |
| Sex                  | Men                           | 41,470            | 55.4   | 2,652             | 54.3   | 3,508               | 56.9   | 4,231               | 56.5   | 6,110                | 57.8   | 24,969             | 54.5   |
| Age<br>(years)       | 18–40                         | 2,205             | 2.9    | 261               | 5.3    | 302                 | 4.9    | 326                 | 4.4    | 389                  | 3.7    | 927                | 2.0    |
|                      | 41–60                         | 29,372            | 39.2   | 2,167             | 44.4   | 2,709               | 43.9   | 3,206               | 42.8   | 4,499                | 42.5   | 16,791             | 36.7   |
|                      | 61–80                         | 40,741            | 54.4   | 2,296             | 47.0   | 2,996               | 48.6   | 3,750               | 50.1   | 5,363                | 50.7   | 26,336             | 57.5   |
|                      | >80                           | 2,591             | 3.5    | 160               | 3.3    | 161                 | 2.6    | 208                 | 2.8    | 328                  | 3.1    | 1,734              | 3.8    |
|                      | Mean (SD)                     | 62.0              | (10.9) | 60.2              | (11.7) | 60.1                | (11.5) | 60.6                | (11.4) | 60.9                 | (11.1) | 62.9               | (10.4) |
| Country of<br>birth  | Median (IQR)                  | 63.0              | (14.0) | 61.0              | (15.0) | 61.0                | (16.0) | 61.0                | (16.0) | 62.0                 | (16.0) | 63.0               | (14.0) |
|                      | Sweden                        | 59,619            | 79.6   | 3,629             | 74.3   | 4,573               | 74.1   | 5,648               | 75.4   | 8,134                | 76.9   | 37,635             | 82.2   |
|                      | Other Nordic<br>country       | 3,977             | 5.3    | 264               | 5.4    | 338                 | 5.5    | 441                 | 5.9    | 574                  | 5.4    | 2,360              | 5.2    |
|                      | Other EU27<br>country         | 2,009             | 2.7    | 160               | 3.3    | 205                 | 3.3    | 230                 | 3.1    | 336                  | 3.2    | 1,078              | 2.4    |
|                      | Rest of Europe                | 2,869             | 3.8    | 237               | 4.9    | 298                 | 4.8    | 343                 | 4.6    | 469                  | 4.4    | 1,522              | 3.3    |
|                      | Africa                        | 1,048             | 1.4    | 124               | 2.5    | 160                 | 2.6    | 166                 | 2.2    | 181                  | 1.7    | 417                | 0.9    |
|                      | The<br>Americas/Oceania       | 733               | 1.0    | 75                | 1.5    | 92                  | 1.5    | 119                 | 1.6    | 134                  | 1.3    | 313                | 0.7    |
|                      | Asia                          | 1,133             | 1.5    | 99                | 2.0    | 134                 | 2.2    | 146                 | 2.0    | 191                  | 1.8    | 563                | 1.2    |
|                      | Middle East<br>country        | 3,521             | 4.7    | 296               | 6.1    | 368                 | 6.0    | 397                 | 5.3    | 560                  | 5.3    | 1,900              | 4.2    |
|                      | Unmarried                     | 12,398            | 16.6   | 859               | 17.6   | 1,092               | 17.7   | 1,299               | 17.3   | 1,866                | 17.6   | 7,282              | 15.9   |
|                      | Married/registered<br>partner | 42,147            | 56.3   | 2,628             | 53.8   | 3,333               | 54.0   | 4,057               | 54.2   | 5,805                | 54.9   | 26,324             | 57.5   |
|                      | Divorced                      | 13,501            | 18.0   | 1,014             | 20.8   | 1,257               | 20.4   | 1,479               | 19.8   | 2,027                | 19.2   | 7,724              | 16.9   |
| Education level      | Widow/widower                 | 6,863             | 9.2    | 383               | 7.8    | 486                 | 7.9    | 655                 | 8.7    | 881                  | 8.3    | 4,458              | 9.7    |
|                      | Compulsory school<br>or lower | 27,433            | 36.6   | 1,710             | 35.0   | 2,149               | 34.8   | 2,657               | 35.5   | 3,775                | 35.7   | 17,142             | 37.4   |
|                      | Upper secondary<br>school     | 33,510            | 44.7   | 2,248             | 46.0   | 2,887               | 46.8   | 3,377               | 45.1   | 4,711                | 44.5   | 20,287             | 44.3   |
| Employment<br>status | Post-secondary                | 13,966            | 18.6   | 926               | 19.0   | 1,132               | 18.4   | 1,456               | 19.4   | 2,093                | 19.8   | 8,359              | 18.3   |
|                      | Unemployed                    | 11,035            | 14.7   | 844               | 17.3   | 1,042               | 16.9   | 1,154               | 15.4   | 1,639                | 15.5   | 6,356              | 13.9   |
|                      | Employed                      | 39,724            | 53.0   | 2,649             | 54.2   | 3,399               | 55.1   | 4,217               | 56.3   | 5,850                | 55.3   | 23,609             | 51.6   |
|                      | Retired*                      | 24,150            | 32.2   | 1,391             | 28.5   | 1,727               | 28.0   | 2,119               | 28.3   | 3,090                | 29.2   | 15,823             | 34.6   |
| Profession           | Upper white collar            | 22,369            | 29.9   | 1,391             | 28.5   | 1,772               | 28.7   | 2,236               | 29.9   | 3,133                | 29.6   | 13,837             | 30.2   |

|                                           |                                                      |        |        |        |        |        |        |        |        |        |        |        |        |
|-------------------------------------------|------------------------------------------------------|--------|--------|--------|--------|--------|--------|--------|--------|--------|--------|--------|--------|
| Individual income<br>(TSEK <sup>†</sup> ) | Lower white collar                                   | 6,252  | 8.4    | 381    | 7.8    | 449    | 7.3    | 633    | 8.5    | 820    | 7.8    | 3,969  | 8.7    |
|                                           | Blue collar                                          | 44,363 | 59.2   | 2,998  | 61.4   | 3,803  | 61.7   | 4,441  | 59.3   | 6,363  | 60.2   | 26,758 | 58.4   |
|                                           | Others                                               | 1,925  | 2.6    | 114    | 2.3    | 144    | 2.3    | 180    | 2.4    | 263    | 2.5    | 1,224  | 2.7    |
|                                           | Mean (SD)                                            | 195    | (297)  | 194    | (362)  | 195    | (256)  | 192    | (188)  | 194    | (180)  | 195    | (330)  |
|                                           | Median (IQR)                                         | 160    | (120)  | 157    | (110)  | 160    | (113)  | 163    | (116)  | 164    | (116)  | 160    | (111)  |
| Diabetes<br>medications                   | No diabetes                                          | 32,951 | 44.0   | 2,159  | 44.2   | 2,671  | 43.3   | 3,209  | 42.8   | 4,721  | 44.6   | 20,191 | 44.1   |
|                                           | Insulin only                                         | 6,054  | 8.1    | 521    | 10.7   | 615    | 10.0   | 725    | 9.7    | 919    | 8.7    | 3,274  | 7.2    |
|                                           | Other glucose-<br>lowering                           | 28,184 | 37.6   | 1,663  | 34.1   | 2,258  | 36.6   | 2,782  | 37.1   | 3,906  | 36.9   | 17,575 | 38.4   |
|                                           | medications only                                     |        |        |        |        |        |        |        |        |        |        |        |        |
|                                           | Insulin and other<br>glucose lowering<br>medications | 7,720  | 10.3   | 541    | 11.1   | 624    | 10.1   | 774    | 10.3   | 1,033  | 9.8    | 4,748  | 10.4   |
| Anticoagulants                            | Yes                                                  | 18,699 | 25.0   | 1,124  | 23.0   | 1,392  | 22.6   | 1,737  | 23.2   | 2,568  | 24.3   | 11,878 | 25.9   |
| Antihypertensives                         | Yes                                                  | 43,978 | 58.7   | 2,523  | 51.7   | 3,229  | 52.4   | 4,090  | 54.6   | 5,853  | 55.3   | 28,283 | 61.8   |
| Cancer diagnosis                          | Yes                                                  | 3,514  | 4.7    | 221    | 4.5    | 279    | 4.5    | 330    | 4.4    | 454    | 4.3    | 2,230  | 4.9    |
| Diabetes duration                         | Mean (SD)                                            | 4.8    | (2.4)  | 5.2    | (3.0)  | 5.0    | (3.0)  | 5.0    | (3.0)  | 4.9    | (2.1)  | 4.7    | (2.0)  |
|                                           | Median (IQR)                                         | 6.3    | (7.0)  | 6.4    | (8.0)  | 6.2    | (7.0)  | 6.4    | (7.0)  | 6.5    | (7.0)  | 6.3    | (7.0)  |
| HbA1c                                     | <5 [<42]                                             | 6,285  | 8.4    | 340    | 7.0    | 492    | 8.0    | 581    | 7.8    | 892    | 8.4    | 3,980  | 8.7    |
| (% [mmol/mol])                            | 5-6 [42–52]                                          | 36,392 | 48.6   | 2,174  | 44.5   | 2,803  | 45.4   | 3,442  | 46.0   | 4,973  | 47.0   | 23,000 | 50.2   |
|                                           | >6 [>52]                                             | 32,232 | 43.0   | 2,370  | 48.5   | 2,873  | 46.6   | 3,467  | 46.3   | 4,714  | 44.6   | 18,808 | 41.1   |
|                                           | Mean (SD)                                            | 6.2    | (2.2)  | 6.3    | (2.3)  | 6.3    | (2.3)  | 6.3    | (2.3)  | 6.2    | (2.2)  | 6.1    | (2.2)  |
|                                           |                                                      | [53.7] | [12.4] | [55.1] | [13.0] | [54.6] | [13.0] | [54.6] | [13.2] | [53.9] | [12.5] | [53.2] | [12.1] |
|                                           | Median (IQR)                                         | 51.0   | (2.2)  | 6.0    | (2.2)  | 6.0    | (2.3)  | 6.0    | (2.3)  | 5.9    | (2.2)  | 5.9    | (2.1)  |
|                                           |                                                      | [5.9]  | [12.0] | [52.0] | [12.0] | [51.4] | [12.8] | [51.5] | [12.7] | [51.0] | [12.1] | [50.3] | [11.0] |
| eGFR                                      | <60                                                  | 5,684  | 7.6    | 322    | 6.6    | 385    | 6.2    | 522    | 7.0    | 696    | 6.6    | 3,759  | 8.2    |
| (ml/min/1.73 m <sup>2</sup> )             | ≥60                                                  | 69,225 | 92.4   | 4,562  | 93.4   | 5,783  | 93.8   | 6,968  | 93.0   | 9,883  | 93.4   | 42,029 | 91.8   |
|                                           | Mean (SD)                                            | 85.9   | (20.1) | 88.1   | (20.6) | 87.9   | (20.0) | 87.3   | (20.6) | 87.4   | (20.9) | 84.8   | (19.8) |
|                                           | Median (IQR)                                         | 84.9   | (22.7) | 87.0   | (22.8) | 87.1   | (23.1) | 86.3   | (22.9) | 86.2   | (22.9) | 83.9   | (22.5) |
| BMI                                       | ≤24.9                                                | 7,651  | 10.2   | 4,884  | 9.7    | 561    | 9.1    | 726    | 9.7    | 1,025  | 9.7    | 4865   | 10.6   |
| (kg/m <sup>2</sup> )                      | 25.0–29.9                                            | 31,553 | 42.1   | 2,089  | 42.8   | 2,664  | 43.2   | 3,149  | 42.0   | 4,413  | 41.7   | 19,238 | 42.0   |
|                                           | ≥30.0                                                | 35,705 | 47.7   | 2,321  | 47.5   | 2,943  | 47.7   | 3,615  | 48.3   | 5,141  | 48.6   | 21,685 | 47.4   |
|                                           | Mean (SD)                                            | 30.2   | (4.6)  | 30.1   | (4.4)  | 30.2   | (4.6)  | 30.3   | (4.6)  | 30.3   | (4.6)  | 30.2   | (4.7)  |
|                                           | Median (IQR)                                         | 29.8   | (5.1)  | 29.8   | (4.9)  | 29.8   | (4.8)  | 29.8   | (5.1)  | 29.9   | (5.0)  | 29.7   | (5.2)  |
| LDL cholesterol                           | <2.5                                                 | 3,630  | 4.9    | 180    | 3.7    | 233    | 3.8    | 330    | 4.4    | 520    | 4.9    | 2,367  | 5.2    |
| (mmol/L)                                  | ≥2.5                                                 | 71,279 | 95.2   | 4,704  | 96.3   | 5,935  | 9.2    | 7,160  | 95.6   | 10,059 | 95.1   | 43,421 | 94.8   |
|                                           | Mean (SD)                                            | 3.6    | (0.6)  | 3.6    | (0.6)  | 3.6    | (0.6)  | 3.6    | (0.6)  | 3.6    | (0.6)  | 3.5    | (0.6)  |
|                                           | Median (IQR)                                         | 3.6    | (0.6)  | 3.6    | (0.6)  | 3.6    | (0.6)  | 3.6    | (0.6)  | 3.6    | (0.6)  | 3.6    | (0.7)  |

|                                |                        |         |           |         |           |         |           |         |           |         |           |         |           |
|--------------------------------|------------------------|---------|-----------|---------|-----------|---------|-----------|---------|-----------|---------|-----------|---------|-----------|
| HDL cholesterol (mmol/L)       | <1.0 (men)/1.3 (women) | 19,060  | 25.4      | 1,329   | 27.2      | 1,584   | 25.7      | 1,929   | 25.8      | 2,733   | 25.8      | 11,485  | 25.1      |
|                                | ≥1.0 (men)/1.3 (women) | 55,849  | 74.6      | 3,555   | 72.8      | 4,584   | 74.3      | 5,561   | 74.3      | 7,846   | 74.2      | 34,303  | 74.9      |
|                                | Mean (SD)              | 1.2/1.4 | (0.3/0.3) | 1.2/1.4 | (0.2/0.3) | 1.2/1.4 | (0.3/0.3) | 1.2/1.4 | (0.3/0.3) | 1.2/1.4 | (0.3/0.3) | 1.2/1.4 | (0.3/0.3) |
|                                | Median (IQR)           | 1.2/1.4 | (0.2/0.3) | 1.2/1.4 | (0.2/0.3) | 1.2/1.4 | (0.2/0.3) | 1.2/1.4 | (0.2/0.3) | 1.2/1.4 | (0.2/0.3) | 1.2/1.4 | (0.2/0.3) |
| Triglycerides (mmol/L)         | <2.0                   | 44,225  | 59.0      | 2,773   | 56.8      | 3,499   | 56.7      | 4,315   | 57.6      | 6,020   | 56.9      | 27,618  | 60.3      |
|                                | ≥2.0                   | 30,684  | 41.0      | 2,111   | 43.2      | 2,669   | 43.3      | 3,175   | 42.4      | 4,559   | 43.1      | 18,170  | 39.7      |
|                                | Mean (SD)              | 2.0     | (1.0)     | 2.1     | (1.0)     | 2.1     | (1.0)     | 2.1     | (1.0)     | 2.1     | (1.0)     | 2.0     | (0.9)     |
|                                | Median (IQR)           | 1.8     | (0.8)     | 1.9     | (0.9)     | 1.9     | (0.8)     | 1.9     | (0.9)     | 1.9     | (0.9)     | 1.8     | (0.8)     |
| Systolic pressure (mmHg)       | <130                   | 17,388  | 23.2      | 1,187   | 24.3      | 1,512   | 24.5      | 1,795   | 24.0      | 2,555   | 24.2      | 10,339  | 22.6      |
|                                | ≥130                   | 57,521  | 76.8      | 3,697   | 75.7      | 4,656   | 75.5      | 5,695   | 76.0      | 8,024   | 75.9      | 35,449  | 77.4      |
|                                | Mean (SD)              | 137.6   | (14.4)    | 137.3   | (14.3)    | 137.3   | (14.4)    | 137.4   | (14.8)    | 137.4   | (14.7)    | 137.8   | (14.3)    |
|                                | Median (IQR)           | 136.8   | (15.0)    | 136.0   | (14.8)    | 136.0   | (15.6)    | 136.0   | (15.0)    | 136.2   | (15.3)    | 137.1   | (15.0)    |
| Diastolic pressure (mmHg)      | <80                    | 33,568  | 44.8      | 2,169   | 44.4      | 2,649   | 43.0      | 3,258   | 43.5      | 4,578   | 43.3      | 20,914  | 45.7      |
|                                | ≥80                    | 41,341  | 55.2      | 2,715   | 55.6      | 3,519   | 57.1      | 4,232   | 56.5      | 6,001   | 56.7      | 24,874  | 54.3      |
|                                | Mean (SD)              | 79.2    | (8.4)     | 79.6    | (8.2)     | 79.7    | (8.2)     | 79.6    | (8.5)     | 79.6    | (8.5)     | 79.0    | (8.4)     |
|                                | Median (IQR)           | 80.0    | (6.8)     | 80.0    | (6.6)     | 80.0    | (6.8)     | 80.0    | (7.0)     | 80.0    | (7.0)     | 80.0    | (6.8)     |
| Microalbuminuria               | Yes                    | 7,124   | 9.5       | 419     | 8.6       | 553     | 9.0       | 707     | 9.4       | 1,028   | 9.7       | 4,417   | 9.7       |
| Macroalbuminuria               | Yes                    | 2,543   | 3.4       | 137     | 2.8       | 202     | 3.3       | 272     | 3.6       | 370     | 3.5       | 1,562   | 3.4       |
| Physical activity <sup>‡</sup> | < once per week        | 15,914  | 21.2      | 1,116   | 22.9      | 1,338   | 21.7      | 1,643   | 21.9      | 2,368   | 22.4      | 9,449   | 20.6      |
|                                | 1-2 times/week         | 14,374  | 19.2      | 920     | 18.8      | 1,184   | 19.2      | 1,476   | 19.7      | 2,029   | 19.2      | 8,765   | 19.1      |
|                                | 3-5 times/week         | 17,025  | 22.7      | 1,020   | 20.9      | 1,287   | 20.9      | 1,631   | 21.8      | 2,365   | 22.4      | 10,722  | 23.4      |
|                                | Daily                  | 27,596  | 36.8      | 1,828   | 37.4      | 2,359   | 38.3      | 2,740   | 36.6      | 3,817   | 36.1      | 16,852  | 36.8      |
| Smoking <sup>§</sup>           | Yes                    | 9,578   | 12.8      | 744     | 15.2      | 972     | 15.8      | 1,079   | 14.4      | 1,541   | 14.6      | 5,242   | 11.5      |

Abbreviations: eGFR, estimated glomerular filtration rate; HbA1c, glycated hemoglobin (A1c); HDL, high-density lipoprotein; IQR, inter quartile range; LDL, low-density lipoprotein; SD, standard deviation; TSEK, thousands of Swedish Krona).

\* If age ≥65 years and unemployed

† One TSEK is equal to approximately 119 USD

‡ 30-minute walk or equivalent

§ At least one cigarette or pipe per day or stopped smoking within three month

**Appendix 2.** Baseline characteristics by level of refill adherence during implementation of lipid-lowering medications, for secondary prevention patients.

|                     |                            | All<br><i>n</i> = 11,659 |        | ≤20%<br><i>n</i> = 598 |        | 21-40%<br><i>n</i> = 666 |        | 41-60%<br><i>n</i> = 870 |        | 61-80%<br><i>n</i> = 1,343 |        | >80%<br><i>n</i> = 8,182 |        |
|---------------------|----------------------------|--------------------------|--------|------------------------|--------|--------------------------|--------|--------------------------|--------|----------------------------|--------|--------------------------|--------|
|                     |                            | <i>n</i>                 | %      | <i>n</i>               | %      | <i>n</i>                 | %      | <i>n</i>                 | %      | <i>n</i>                   | %      | <i>n</i>                 | %      |
| Sex                 | Men                        | 7,666                    | 65.8   | 379                    | 63.4   | 416                      | 62.5   | 537                      | 61.7   | 878                        | 65.4   | 5,456                    | 66.7   |
| Age<br>(years)      | 18–40                      | 57                       | 0.5    | 5                      | 0.8    | 3                        | 0.5    | 3                        | 0.3    | 8                          | 0.6    | 38                       | 0.5    |
|                     | 41–60                      | 2,451                    | 21.0   | 134                    | 22.4   | 173                      | 26.0   | 198                      | 22.8   | 270                        | 20.1   | 1,676                    | 20.5   |
|                     | 61–80                      | 7,705                    | 66.1   | 386                    | 64.6   | 418                      | 62.8   | 556                      | 63.9   | 922                        | 68.7   | 5,423                    | 66.3   |
|                     | >80                        | 1,446                    | 12.4   | 73                     | 12.2   | 72                       | 10.8   | 113                      | 13.0   | 143                        | 10.7   | 1,045                    | 12.8   |
|                     | Mean (SD)                  | 68.5                     | (10.2) | 68.1                   | (10.4) | 67.3                     | (10.5) | 68.3                     | (10.1) | 68.3                       | (10.1) | 68.6                     | (10.2) |
| Country of<br>birth | Median                     | 69.0                     | (15.0) | 68.0                   | (15.0) | 68.0                     | (15.0) | 68.0                     | (15.0) | 69.0                       | (14.0) | 69.0                     | (14.0) |
|                     | Sweden                     | 9,403                    | 80.7   | 458                    | 76.6   | 483                      | 72.5   | 664                      | 76.3   | 1,045                      | 77.8   | 6,753                    | 82.5   |
|                     | Other Nordic country       | 771                      | 6.6    | 59                     | 9.9    | 59                       | 8.9    | 69                       | 7.9    | 93                         | 6.9    | 491                      | 6.0    |
|                     | Other EU27 country         | 373                      | 3.2    | 14                     | 2.3    | 34                       | 5.1    | 30                       | 3.5    | 49                         | 3.7    | 246                      | 3.0    |
|                     | Rest of Europe             | 459                      | 3.9    | 31                     | 5.2    | 41                       | 6.2    | 41                       | 4.7    | 54                         | 4.0    | 292                      | 3.6    |
|                     | Africa                     | 91                       | 0.8    | 6                      | 1.0    | 6                        | 0.9    | 13                       | 1.5    | 17                         | 1.3    | 49                       | 0.6    |
|                     | The Americas/Oceania       | 80                       | 0.7    | 7                      | 1.2    | 9                        | 1.4    | 6                        | 0.7    | 10                         | 0.7    | 48                       | 0.6    |
|                     | Asia                       | 98                       | 0.8    | 6                      | 1.0    | 4                        | 0.6    | 8                        | 0.9    | 14                         | 1.0    | 66                       | 0.8    |
|                     | Middle East country        | 384                      | 3.3    | 17                     | 2.8    | 30                       | 4.5    | 39                       | 4.5    | 61                         | 4.5    | 237                      | 2.9    |
|                     | Marital status             |                          |        |                        |        |                          |        |                          |        |                            |        |                          |        |
| Education level     | Unmarried                  | 1,380                    | 11.8   | 73                     | 12.2   | 73                       | 11.0   | 121                      | 13.9   | 146                        | 10.9   | 967                      | 11.8   |
|                     | Married/registered partner | 6,384                    | 54.8   | 322                    | 53.9   | 337                      | 50.6   | 440                      | 50.6   | 698                        | 52.0   | 4,587                    | 56.1   |
|                     | Divorced                   | 2,246                    | 19.3   | 133                    | 22.2   | 165                      | 24.8   | 190                      | 21.8   | 309                        | 23.0   | 1,449                    | 17.7   |
|                     | Widow/widower              | 1,649                    | 14.1   | 70                     | 11.7   | 91                       | 13.7   | 119                      | 13.7   | 190                        | 14.2   | 1,179                    | 14.4   |
|                     | Compulsory school or lower | 5,386                    | 46.2   | 263                    | 44.0   | 295                      | 44.3   | 404                      | 46.4   | 600                        | 44.7   | 3,824                    | 46.7   |
| Employment status   | Upper secondary school     | 4,640                    | 39.8   | 249                    | 41.6   | 271                      | 40.7   | 352                      | 40.5   | 559                        | 41.6   | 3,209                    | 39.2   |
|                     | Post-secondary             | 1,633                    | 14.0   | 86                     | 14.4   | 100                      | 15.0   | 114                      | 13.1   | 184                        | 13.7   | 1,149                    | 14.0   |
|                     | Unemployed                 | 1,420                    | 12.2   | 110                    | 18.4   | 104                      | 15.6   | 137                      | 15.8   | 174                        | 13.0   | 895                      | 10.9   |
|                     | Employed                   | 4,067                    | 34.9   | 182                    | 30.4   | 222                      | 33.3   | 276                      | 31.7   | 451                        | 33.6   | 2,936                    | 35.9   |
|                     | Retired*                   | 6,172                    | 52.9   | 306                    | 51.2   | 340                      | 51.1   | 457                      | 52.5   | 718                        | 53.5   | 4,351                    | 53.2   |
| Profession          | Upper white collar         | 3,247                    | 27.9   | 152                    | 25.4   | 174                      | 26.1   | 218                      | 25.1   | 390                        | 29.0   | 2,313                    | 28.3   |
|                     | Lower white collar         | 814                      | 7.0    | 40                     | 6.7    | 54                       | 8.1    | 52                       | 6.0    | 99                         | 7.4    | 569                      | 7.0    |
|                     | Blue collar                | 7,203                    | 61.8   | 380                    | 63.6   | 421                      | 63.2   | 584                      | 67.1   | 802                        | 59.7   | 5,016                    | 61.3   |
|                     | Others                     | 395                      | 3.4    | 26                     | 4.4    | 17                       | 2.6    | 16                       | 1.8    | 52                         | 3.9    | 284                      | 3.5    |

|                                        |                                                |        |         |        |         |        |         |        |         |        |         |        |         |
|----------------------------------------|------------------------------------------------|--------|---------|--------|---------|--------|---------|--------|---------|--------|---------|--------|---------|
| Individual income (TSEK <sup>†</sup> ) | Mean (SD)                                      | 195    | (297)   | 154    | (107)   | 155    | (938)   | 161    | (122)   | 170    | (143)   | 178    | (207)   |
|                                        | Median (IQR)                                   | 160    | (112)   | 132    | (693)   | 133    | (732)   | 132    | (763)   | 149    | (741)   | 141    | (841)   |
| Diabetes medications                   | No diabetes                                    | 5,901  | 50.6    | 268    | 44.8    | 311    | 46.7    | 377    | 43.3    | 613    | 45.6    | 4,332  | 53.0    |
|                                        | Insulin only                                   | 1,083  | 9.3     | 81     | 13.6    | 81     | 12.2    | 95     | 10.9    | 131    | 9.8     | 695    | 8.5     |
|                                        | Other glucose-lowering medications only        | 3,364  | 28.9    | 175    | 29.3    | 190    | 28.5    | 282    | 32.4    | 429    | 31.9    | 2,288  | 28.0    |
|                                        | Insulin and other glucose lowering medications | 1,311  | 11.2    | 74     | 12.4    | 84     | 12.6    | 116    | 13.3    | 170    | 12.7    | 867    | 10.6    |
| Anticoagulants                         | Yes                                            | 6,658  | 57.1    | 420    | 70.2    | 435    | 65.3    | 594    | 68.3    | 889    | 66.2    | 4,320  | 52.8    |
| Antihypertensives                      | Yes                                            | 7,822  | 67.1    | 440    | 73.6    | 449    | 67.4    | 621    | 71.4    | 964    | 71.8    | 5,348  | 65.4    |
| Cancer diagnosis                       | Yes                                            | 814    | 7.0     | 32     | 5.4     | 37     | 5.6     | 51     | 5.9     | 93     | 6.9     | 601    | 7.4     |
| Diabetes duration (years)              | Mean (SD)                                      | 5.8    | (7.6)   | 6.9    | (8.8)   | 6.5    | (7.6)   | 6.9    | (8.3)   | 6.3    | (7.5)   | 5.5    | (7.4)   |
|                                        | Median (IQR)                                   | 3.0    | (7.0)   | 4.5    | (9.0)   | 4.0    | (10.0)  | 4.6    | (10.0)  | 4.0    | (10.0)  | 2.4    | (9.0)   |
| HbA1c (% [mmol/mol])                   | <5 [<42]                                       | 804    | 6.9     | 25     | 4.2     | 42     | 6.3     | 48     | 5.5     | 88     | 6.6     | 601    | 7.4     |
|                                        | 5-6 [42-52]                                    | 6,285  | 53.9    | 289    | 48.3    | 318    | 47.8    | 450    | 51.7    | 719    | 53.5    | 4,509  | 55.1    |
|                                        | >6 [>52]                                       | 4,570  | 39.2    | 284    | 47.5    | 306    | 46.0    | 372    | 42.8    | 536    | 39.9    | 3,072  | 37.6    |
|                                        | Mean (SD)                                      | 6.1    | (2.1)   | 6.3    | (2.2)   | 6.2    | (2.1)   | 6.2    | (2.2)   | 6.1    | (2.1)   | 6.0    | (2.0)   |
| eGFR (ml/min/1.73 m <sup>2</sup> )     |                                                | [52.6] | [10.7]) | [54.6] | [11.7]) | [54.1] | [11.1]) | [53.9] | [11.9]) | [52.7] | [11.0]) | [52.2] | [10.3]) |
|                                        | Median (IQR)                                   | 5.8    | (2.2)   | 6.0    | (2.2)   | 6.0    | (2.2)   | 5.9    | (2.2)   | 5.8    | (2.1)   | 5.8    | (2.0)   |
|                                        |                                                | [50.0] | [12.0]) | [51.9] | [12.5]) | [51.6] | [12.2]) | [50.9] | [11.7]) | [50.0] | [11.0]) | [50.0] | [10.0]) |
|                                        | <60                                            | 1,650  | 14.2    | 94     | 15.7    | 80     | 12.0    | 131    | 15.1    | 175    | 13.0    | 1,170  | 14.3    |
| BMI (kg/m <sup>2</sup> )               | ≥60                                            | 10,009 | 85.9    | 504    | 84.3    | 586    | 88.0    | 739    | 84.9    | 1,168  | 87.0    | 7,012  | 85.7    |
|                                        | Mean (SD)                                      | 78.6   | (19.2)  | 78.8   | (18.5)  | 79.7   | (21.0)  | 78.4   | (18.8)  | 79.7   | (19.1)  | 78.3   | (19.1)  |
|                                        | Median (IQR)                                   | 78.5   | (22.7)  | 79.5   | (22.9)  | 78.4   | (21.9)  | 78.8   | (23.3)  | 78.9   | (22.2)  | 78.3   | (22.0)  |
|                                        | ≤24.9                                          | 1,214  | 10.4    | 59     | 9.9     | 59     | 8.9     | 81     | 9.3     | 149    | 11.1    | 866    | 10.4    |
| LDL cholesterol (mmol/L)               | 25.0-29.9                                      | 5,993  | 51.4    | 301    | 50.3    | 327    | 49.1    | 448    | 51.5    | 680    | 50.6    | 4,237  | 51.8    |
|                                        | ≥30.0                                          | 4,452  | 38.2    | 238    | 39.8    | 280    | 42.0    | 341    | 39.2    | 514    | 38.3    | 3,079  | 37.6    |
|                                        | Mean (SD)                                      | 29.4   | (4.0)   | 29.6   | (4.0)   | 29.6   | (3.9)   | 29.6   | (4.1)   | 29.3   | (3.9)   | 29.3   | (4.0)   |
|                                        | Median (IQR)                                   | 29.0   | (5.1)   | 29.2   | (4.6)   | 29.2   | (4.3)   | 29.3   | (4.5)   | 29.2   | (4.5)   | 29.0   | (4.3)   |
| HDL cholesterol                        | <2.5                                           | 756    | 6.5     | 28     | 4.7     | 45     | 6.8     | 60     | 6.9     | 101    | 7.5     | 522    | 6.4     |
|                                        | ≥2.5                                           | 1093   | 93.5    | 570    | 95.3    | 621    | 93.2    | 810    | 93.1    | 1242   | 92.5    | 7660   | 93.6    |
| HDL cholesterol                        | 0                                              |        |         |        |         |        |         |        |         |        |         |        |         |
|                                        | Mean (SD)                                      | 3.4    | (0.6)   | 3.5    | (0.6)   | 3.4    | (0.6)   | 3.4    | (0.6)   | 3.4    | (0.6)   | 3.4    | (0.6)   |
|                                        | Median (IQR)                                   | 3.5    | (0.7)   | 3.5    | (0.6)   | 3.4    | (0.6)   | 3.5    | (0.7)   | 3.5    | (0.6)   | 3.5    | (0.6)   |
|                                        | <1.0 (men)/1.3                                 | 2154   | 18.5    | 111    | 18.6    | 115    | 17.3    | 190    | 21.8    | 251    | 18.7    | 1,487  | 18.2    |

|                                |                        |         |           |         |           |         |           |         |           |         |           |         |           |
|--------------------------------|------------------------|---------|-----------|---------|-----------|---------|-----------|---------|-----------|---------|-----------|---------|-----------|
| (mmol/L)                       | (women)                |         |           |         |           |         |           |         |           |         |           |         |           |
|                                | ≥1.0 (men)/1.3 (women) | 9505    | 81.5      | 487     | 81.4      | 551     | 82.7      | 680     | 78.2      | 1092    | 81.2      | 6,695   | 81.8      |
|                                | Mean (SD)              | 1.2/1.4 | (0.2/0.3) | 1.2/1.4 | (0.2/0.3) | 1.2/1.4 | (0.3/0.3) | 1.2/1.4 | (0.2/0.3) | 1.2/1.4 | (0.2/0.3) | 1.2/1.4 | (0.2/0.3) |
|                                | men/women              | 4       |           |         |           |         |           |         |           |         |           |         |           |
|                                | Median (IQR)           | 1.2/1.4 | (0.2/0.3) | 1.2/1.4 | (0.2/0.3) | 1.2/1.4 | (0.2/0.3) | 1.2/1.4 | (0.2/0.3) | 1.2/1.4 | (0.2/0.3) | 1.2/1.4 | (0.2/0.3) |
|                                | men/women              | 4       |           |         |           |         |           |         |           |         |           |         |           |
| Triglycerides                  | <2.0                   | 7529    | 64.6      | 365     | 61.0      | 424     | 63.7      | 514     | 59.1      | 885     | 65.9      | 5341    | 65.3      |
| (mmol/L)                       | ≥2.0                   | 4130    | 35.4      | 233     | 39.0      | 242     | 36.3      | 356     | 40.9      | 458     | 34.1      | 2841    | 34.7      |
|                                | Mean (SD)              | 1.9     | (0.7)     | 2.0     | (0.8)     | 2.0     | (0.8)     | 2.0     | (0.9)     | 1.9     | (0.8)     | 1.9     | (0.7)     |
|                                | Median (IQR)           | 1.8     | (0.8)     | 1.8     | (0.8)     | 1.8     | (0.7)     | 1.8     | (0.9)     | 1.8     | (0.7)     | 1.8     | (0.7)     |
| Systolic pressure              | <130                   | 2,451   | 21.0      | 104     | 17.4      | 143     | 21.5      | 166     | 19.1      | 265     | 19.7      | 1,773   | 21.7      |
| (mmHg)                         | ≥130                   | 9,208   | 79.0      | 494     | 82.6      | 523     | 78.5      | 704     | 80.9      | 1,078   | 80.3      | 6,409   | 78.3      |
|                                | Mean (SD)              | 138.2   | (14.6)    | 140.0   | (15.0)    | 138.9   | (14.7)    | 139.3   | (15.4)    | 138.5   | (14.4)    | 137.9   | (14.5)    |
|                                | Median (IQR)           | 137.6   | (15.0)    | 139.3   | (17.3)    | 137.7   | (17.1)    | 138.0   | (16.0)    | 138.0   | (15.0)    | 137.4   | (15.0)    |
| Diastolic pressure             | <80                    | 6,956   | 59.7      | 349     | 58.4      | 386     | 58.0      | 518     | 59.5      | 803     | 59.8      | 4,900   | 59.9      |
| (mmHg)                         | ≥80                    | 4,703   | 40.3      | 249     | 41.6      | 280     | 42.0      | 352     | 40.5      | 540     | 40.2      | 3,282   | 40.1      |
|                                | Mean (SD)              | 77.1    | (8.2)     | 77.9    | (7.8)     | 77.8    | (8.6)     | 77.1    | (8.0)     | 77.2    | (8.3)     | 76.9    | (8.1)     |
|                                | Median (IQR)           | 78.0    | (5.0)     | 78.2    | (5.8)     | 78.0    | (5.4)     | 77.9    | (5.0)     | 77.7    | (5.6)     | 78.0    | (5.8)     |
| Microalbuminuria               | Yes                    | 1,282   | 11.0      | 80      | 13.4      | 73      | 11.0      | 111     | 12.8      | 175     | 13.0      | 843     | 10.3      |
| Macroalbuminuria               | Yes                    | 561     | 3.2       | 32      | 5.4       | 28      | 4.2       | 60      | 6.9       | 64      | 4.8       | 377     | 4.6       |
| Physical activity <sup>‡</sup> | < once per week        | 2,780   | 23.8      | 155     | 25.9      | 172     | 25.8      | 212     | 24.4      | 320     | 23.8      | 1,921   | 23.5      |
|                                | 1-2 times/week         | 2,131   | 18.3      | 100     | 16.7      | 116     | 17.4      | 167     | 19.2      | 245     | 18.2      | 1,503   | 18.4      |
|                                | 3-5 times/week         | 2,370   | 20.3      | 114     | 19.1      | 141     | 21.2      | 172     | 19.8      | 268     | 20.0      | 1,675   | 20.5      |
|                                | Daily                  | 4,378   | 37.6      | 229     | 38.3      | 237     | 35.6      | 319     | 36.7      | 510     | 38.0      | 3,083   | 37.7      |
| Smoking <sup>§</sup>           | Yes                    | 1,116   | 9.6       | 71      | 11.9      | 77      | 11.6      | 108     | 12.4      | 168     | 12.5      | 692     | 8.5       |

Abbreviations: eGFR, estimated glomerular filtration rate; HbA1c, glycated hemoglobin (A1c); HDL, high-density lipoprotein; IQR, inter quartile range; LDL, low-density lipoprotein; SD, standard deviation; TSEK, thousands of Swedish Krona).

\* If age ≥65 years and unemployed

† One TSEK is equal to approximately 119 USD

‡ 30-minute walk or equivalent

§ At least one cigarette or pipe per day or stopped smoking within three month

**Appendix 3.** Adjusted\* hazard ratios for CV events and mortality by level of refill adherence during implementation of lipid-lowering medications, for multiple imputation and complete case analysis.

|                                 | MPR (%) | Primary prevention                        |                  |            |                                     |                  |            | Secondary prevention                      |                  |            |                                    |                  |            |
|---------------------------------|---------|-------------------------------------------|------------------|------------|-------------------------------------|------------------|------------|-------------------------------------------|------------------|------------|------------------------------------|------------------|------------|
|                                 |         | Multiple imputations<br><i>n</i> = 74,909 |                  |            | Complete cases<br><i>n</i> = 17,058 |                  |            | Multiple imputations<br><i>n</i> = 11,659 |                  |            | Complete cases<br><i>n</i> = 1,591 |                  |            |
|                                 |         | Hazard ratio                              |                  |            | Hazard ratio                        |                  |            | Hazard ratio                              |                  |            | Hazard ratio                       |                  |            |
|                                 |         | <i>n</i>                                  | (95% CI)         | p-value    | <i>n</i>                            | (95% CI)         | p-value    | <i>n</i>                                  | (95% CI)         | p-value    | <i>n</i>                           | (95% CI)         | p-value    |
| <b>Any CV event</b>             | ≤20     | 577                                       | 2.36 (2.29–2.42) | <0.0001    | 100                                 | 2.70 (2.17–2.36) | <0.0001    | 273                                       | 1.58 (1.52–1.64) | <0.0001    | 39                                 | 1.94 (1.37–2.74) | 0.0002     |
|                                 | 21-40   | 566                                       | 1.84 (1.79–1.90) | <0.0001    | 105                                 | 2.20 (1.77–2.72) | <0.0001    | 259                                       | 1.36 (1.30–1.41) | <0.0001    | 35                                 | 1.47 (1.03–2.10) | 0.0364     |
|                                 | 41-60   | 583                                       | 1.52 (1.48–1.57) | <0.0001    | 121                                 | 1.75 (1.43–1.4)  | <0.0001    | 337                                       | 1.28 (1.23–1.32) | <0.0001    | 41                                 | 1.41 (1.01–1.98) | 0.0460     |
|                                 | 61-80   | 741                                       | 1.33 (1.29–1.36) | <0.0001    | 124                                 | 1.35 (1.11–1.65) | 0.0033     | 479                                       | 1.19 (1.15–1.23) | <0.0001    | 64                                 | 1.20 (0.91–1.58) | 0.2046     |
|                                 | >80     | 2,542                                     | <i>ref</i>       | <i>ref</i> | 451                                 | <i>ref</i>       | <i>ref</i> | 2,435                                     | <i>ref</i>       | <i>ref</i> | 284                                | <i>ref</i>       | <i>ref</i> |
| <b>Unstable angina pectoris</b> | ≤20     | 197                                       | 2.23 (2.12–2.34) | <0.0001    | 36                                  | 2.86 (1.98–4.14) | <0.0001    | 97                                        | 1.69 (1.58–1.81) | <0.0001    | 10                                 | 1.35 (0.68–2.66) | 0.3934     |
|                                 | 21-40   | 210                                       | 1.91 (1.82–2.00) | <0.0001    | 40                                  | 2.52 (1.78–3.60) | <0.0001    | 85                                        | 1.38 (1.28–1.48) | <0.0001    | 12                                 | 1.56 (0.84–2.90) | 0.1578     |
|                                 | 41-60   | 198                                       | 1.47 (1.40–1.54) | <0.0001    | 31                                  | 1.35 (0.92–2.00) | 0.1294     | 126                                       | 1.51 (1.42–1.60) | <0.0001    | 15                                 | 1.49 (0.84–2.63) | 0.1747     |
|                                 | 61-80   | 266                                       | 1.36 (1.30–1.42) | <0.0001    | 42                                  | 1.42 (1.00–2.00) | 0.0482     | 177                                       | 1.44 (1.36–1.52) | <0.0001    | 25                                 | 1.26 (0.80–1.98) | 0.3225     |
|                                 | >80     | 869                                       | <i>ref</i>       | <i>ref</i> | 144                                 | <i>ref</i>       | <i>ref</i> | 698                                       | <i>ref</i>       | <i>ref</i> | 94                                 | <i>ref</i>       | <i>ref</i> |
| <b>Myocardial infarction</b>    | ≤20     | 257                                       | 3.37 (3.22–3.52) | <0.0001    | 44                                  | 3.74 (2.65–5.29) | <0.0001    | 92                                        | 2.62 (2.44–2.82) | <0.0001    | 15                                 | 3.20 (1.74–5.89) | <0.0001    |
|                                 | 21-40   | 218                                       | 2.29 (2.19–2.41) | <0.0001    | 40                                  | 2.63 (1.84–3.76) | <0.0001    | 66                                        | 1.72 (1.59–1.87) | <0.0001    | 11                                 | 2.12 (1.07–4.18) | 0.0307     |
|                                 | 41-60   | 206                                       | 1.76 (1.68–1.85) | <0.0001    | 44                                  | 2.12 (1.50–2.99) | <0.0001    | 89                                        | 1.69 (1.57–1.82) | <0.0001    | 12                                 | 1.89 (0.98–3.64) | 0.0570     |
|                                 | 61-80   | 234                                       | 1.39 (1.32–1.45) | <0.0001    | 45                                  | 1.62 (1.15–2.28) | 0.0054     | 112                                       | 1.40 (1.31–1.50) | <0.0001    | 15                                 | 1.42 (0.78–2.58) | 0.2491     |
|                                 | >80     | 758                                       | <i>ref</i>       | <i>ref</i> | 131                                 | <i>ref</i>       | <i>ref</i> | 448                                       | <i>ref</i>       | <i>ref</i> | 49                                 | <i>ref</i>       | <i>ref</i> |
| <b>Ischemic heart disease</b>   | ≤20     | 231                                       | 2.41 (2.30–2.52) | <0.0001    | 40                                  | 2.84 (2.00–4.02) | <0.0001    | 174                                       | 1.36 (1.29–1.43) | <0.0001    | 27                                 | 2.00 (1.32–3.04) | 0.0012     |
|                                 | 21-40   | 237                                       | 2.00 (1.90–2.08) | <0.0001    | 41                                  | 2.21 (1.57–3.12) | <0.0001    | 178                                       | 1.28 (1.21–1.34) | <0.0001    | 25                                 | 1.58 (1.03–2.42) | 0.0381     |
|                                 | 41-60   | 235                                       | 1.59 (1.52–1.67) | <0.0001    | 42                                  | 1.60 (1.14–2.25) | 0.0067     | 235                                       | 1.23 (1.18–1.29) | <0.0001    | 28                                 | 1.45 (0.96–2.19) | 0.0781     |
|                                 | 61-80   | 294                                       | 1.37 (1.31–1.43) | <0.0001    | 55                                  | 1.59 (1.17–2.15) | 0.0032     | 337                                       | 1.16 (1.12–1.21) | <0.0001    | 44                                 | 1.27 (0.91–1.78) | 0.1643     |
|                                 | >80     | 953                                       | <i>ref</i>       | <i>ref</i> | 168                                 | <i>ref</i>       | <i>ref</i> | 1,746                                     | <i>ref</i>       | <i>ref</i> | 185                                | <i>ref</i>       | <i>ref</i> |
| <b>Stroke</b>                   | ≤20     | 192                                       | 2.29 (2.18–2.40) | <0.0001    | 39                                  | 2.96 (2.07–4.22) | <0.0001    | 85                                        | 2.07 (1.92–2.23) | <0.0001    | 10                                 | 1.99 (0.98–4.01) | 0.0553     |
|                                 | 21-40   | 179                                       | 1.75 (1.66–1.84) | <0.0001    | 36                                  | 2.19 (1.52–3.15) | <0.0001    | 79                                        | 1.84 (1.71–1.99) | <0.0001    | 11                                 | 1.70 (0.88–3.26) | 0.1120     |
|                                 | 41-60   | 188                                       | 1.47 (1.40–1.54) | <0.0001    | 42                                  | 1.78 (1.27–2.51) | 0.0010     | 86                                        | 1.40 (1.30–1.50) | <0.0001    | 14                                 | 2.23 (1.23–4.07) | 0.0088     |
|                                 | 61-80   | 252                                       | 1.37 (1.31–1.43) | <0.0001    | 35                                  | 1.10 (0.76–1.59) | 0.6042     | 103                                       | 1.11 (1.03–1.18) | 0.0032     | 14                                 | 1.09 (0.61–1.96) | 0.7719     |
|                                 | >80     | 855                                       | <i>ref</i>       | <i>ref</i> | 156                                 | <i>ref</i>       | <i>ref</i> | 537                                       | <i>ref</i>       | <i>ref</i> | 69                                 | <i>ref</i>       | <i>ref</i> |
| <b>All-cause mortality</b>      | ≤20     | 231                                       | 0.98 (0.94–1.02) | 0.8547     | 26                                  | 0.66 (0.44–0.98) | 0.0410     | 103                                       | 1.24 (1.16–1.32) | <0.0001    | 13                                 | 1.14 (0.62–2.07) | 0.6776     |
|                                 | 21-40   | 320                                       | 1.16 (1.12–1.20) | <0.0001    | 53                                  | 1.14 (0.85–1.51) | 0.3860     | 104                                       | 1.25 (1.17–1.34) | <0.0001    | 11                                 | 0.83 (0.44–1.57) | 0.5613     |
|                                 | 41-60   | 381                                       | 1.10 (1.06–1.13) | <0.0001    | 75                                  | 1.10 (0.86–1.40) | 0.4620     | 125                                       | 1.07 (1.01–1.14) | 0.0266     | 13                                 | 0.86 (0.48–1.56) | 0.6294     |
|                                 | 61-80   | 577                                       | 1.14 (1.11–1.18) | <0.0001    | 113                                 | 1.27 (1.03–1.56) | 0.0240     | 199                                       | 1.15 (1.09–1.21) | <0.0001    | 25                                 | 0.98 (0.62–1.53) | 0.9104     |
|                                 | >80     | 2,391                                     | <i>ref</i>       | <i>ref</i> | 445                                 | <i>ref</i>       | <i>ref</i> | 990                                       | <i>ref</i>       | <i>ref</i> | 120                                | <i>ref</i>       | <i>ref</i> |
| <b>CV</b>                       | ≤20     | 84                                        | 1.18 (1.10–1.27) | <0.0001    | 9                                   | 0.82 (0.41–1.61) | 0.5581     | 64                                        | 1.48 (1.36–1.61) | <0.0001    | 9                                  | 1.89 (0.89–4.02) | 0.0999     |

|                  |       |     |                  |            |     |                  |            |     |                  |            |    |                  |            |
|------------------|-------|-----|------------------|------------|-----|------------------|------------|-----|------------------|------------|----|------------------|------------|
| <b>mortality</b> | 21-40 | 105 | 1.26 (1.18–1.34) | <0.0001    | 15  | 1.19 (0.69–2.05) | 0.5275     | 59  | 1.35 (1.24–1.47) | <0.0001    | 10 | 1.74 (0.85–3.58) | 0.1307     |
|                  | 41-60 | 109 | 1.03 (0.97–1.10) | 0.3506     | 25  | 1.25 (0.81–1.94) | 0.3171     | 75  | 1.23 (1.14–1.33) | <0.0001    | 8  | 1.38 (0.64–3.01) | 0.4115     |
|                  | 61-80 | 183 | 1.18 (1.12–1.25) | <0.0001    | 33  | 1.31 (0.89–1.93) | 0.1751     | 108 | 1.19 (1.12–1.28) | <0.0001    | 13 | 1.21 (0.64–2.30) | 0.5604     |
|                  | >80   | 723 | <i>ref</i>       | <i>ref</i> | 119 | <i>ref</i>       | <i>ref</i> | 518 | <i>ref</i>       | <i>ref</i> | 54 | <i>ref</i>       | <i>ref</i> |

Abbreviations: CI, confidence interval; CV, cardiovascular; MPR, medication possession ratio; ref, reference.

\*Adjusted for all baseline covariates.



**Appendix 4.** Adjusted\* hazard ratios for CV events and mortality in relation to 18-months persistence to lipid-lowering medications, for multiple imputations and complete case analysis.

|                                 |     | Primary prevention                        |                  |            |                                     |                  |            | Secondary prevention                      |                  |            |                                    |                  |            |
|---------------------------------|-----|-------------------------------------------|------------------|------------|-------------------------------------|------------------|------------|-------------------------------------------|------------------|------------|------------------------------------|------------------|------------|
|                                 |     | Multiple imputations<br><i>n</i> = 74,909 |                  |            | Complete cases<br><i>n</i> = 17,058 |                  |            | Multiple imputations<br><i>n</i> = 11,659 |                  |            | Complete cases<br><i>n</i> = 1,591 |                  |            |
|                                 |     | Hazard ratio<br>(95% CI)                  |                  |            | Hazard ratio<br>(95% CI)            |                  |            | Hazard ratio<br>(95% CI)                  |                  |            | Hazard ratio<br>(95% CI)           |                  |            |
| Persistent                      |     | <i>n</i>                                  |                  | p-value    | <i>n</i>                            |                  | p-value    | <i>n</i>                                  |                  | p-value    | <i>n</i>                           |                  | p-value    |
| <b>Any CV event</b>             | No  | 1,568                                     | 1.65 (1.62–1.68) | <0.0001    | 290                                 | 1.96 (1.70–2.26) | <0.0001    | 779                                       | 1.22 (1.19–1.25) | <0.0001    | 98                                 | 1.36 (1.08–1.72) | 0.0090     |
|                                 | Yes | 3,441                                     | <i>ref</i>       | <i>ref</i> | 611                                 | <i>ref</i>       | <i>ref</i> | 3,004                                     | <i>ref</i>       | <i>ref</i> | 365                                | <i>ref</i>       | <i>ref</i> |
| <b>Unstable angina pectoris</b> | No  | 554                                       | 1.71 (1.66–1.77) | <0.0001    | 102                                 | 2.11 (1.66–2.69) | <0.0001    | 268                                       | 1.34 (1.28–1.40) | <0.0001    | 29                                 | 1.15 (0.75–1.75) | 0.5274     |
|                                 | Yes | 1,186                                     | <i>ref</i>       | <i>ref</i> | 191                                 | <i>ref</i>       | <i>ref</i> | 915                                       | <i>ref</i>       | <i>ref</i> | 127                                | <i>ref</i>       | <i>ref</i> |
| <b>Myocardial infarction</b>    | No  | 624                                       | 2.20 (2.13–2.27) | <0.0001    | 115                                 | 2.38 (1.88–3.00) | <0.0001    | 227                                       | 1.88 (1.79–1.97) | <0.0001    | 35                                 | 2.19 (1.42–3.37) | 0.0004     |
|                                 | Yes | 1,049                                     | <i>ref</i>       | <i>ref</i> | 189                                 | <i>ref</i>       | <i>ref</i> | 580                                       | <i>ref</i>       | <i>ref</i> | 67                                 | <i>ref</i>       | <i>ref</i> |
| <b>Ischemic heart disease</b>   | No  | 637                                       | 1.79 (1.74–1.85) | <0.0001    | 114                                 | 1.99 (1.58–2.49) | <0.0001    | 529                                       | 1.25 (1.22–1.29) | <0.0001    | 70                                 | 1.48 (1.12–1.95) | 0.0058     |
|                                 | Yes | 1,313                                     | <i>ref</i>       | <i>ref</i> | 232                                 | <i>ref</i>       | <i>ref</i> | 2,141                                     | <i>ref</i>       | <i>ref</i> | 239                                | <i>ref</i>       | <i>ref</i> |
| <b>Stroke</b>                   | No  | 513                                       | 1.69 (1.63–1.75) | <0.0001    | 102                                 | 2.03 (1.60–2.50) | <0.0001    | 221                                       | 1.61 (1.53–1.69) | <0.0001    | 27                                 | 1.43 (0.91–2.25) | 0.1181     |
|                                 | Yes | 1,153                                     | <i>ref</i>       | <i>ref</i> | 206                                 | <i>ref</i>       | <i>ref</i> | 669                                       | <i>ref</i>       | <i>ref</i> | 91                                 | <i>ref</i>       | <i>ref</i> |
| <b>All-cause mortality</b>      | No  | 842                                       | 1.06 (1.04–1.09) | <0.0001    | 133                                 | 0.98 (0.77–1.12) | 0.4454     | 308                                       | 1.18 (1.13–1.23) | <0.0001    | 34                                 | 0.92 (0.62–1.37) | 0.6867     |
|                                 | Yes | 3,058                                     | <i>ref</i>       | <i>ref</i> | 579                                 | <i>ref</i>       | <i>ref</i> | 1,213                                     | <i>ref</i>       | <i>ref</i> | 148                                | <i>ref</i>       | <i>ref</i> |
| <b>CV mortality</b>             | No  | 276                                       | 1.15 (1.10–1.20) | <0.0001    | 42                                  | 1.03 (0.93–1.46) | 0.8469     | 179                                       | 1.29 (1.22–1.36) | <0.0001    | 25                                 | 1.57 (0.96–2.58) | 0.0714     |
|                                 | Yes | 928                                       | <i>ref</i>       | <i>ref</i> | 159                                 | <i>ref</i>       | <i>ref</i> | 645                                       | <i>ref</i>       | <i>ref</i> | 69                                 | <i>ref</i>       | <i>ref</i> |

Abbreviations: CI, confidence interval; CV, cardiovascular; MPR, medication possession ratio; ref, reference.

\*Adjusted for all baseline covariates.
